# Supplementary material for: Balancing productivity and sustainability: Cattle farming, energy intensity, and environmental degradation in Latin America
Source: Research Square preprint supplement (doi:10.21203/rs.3.rs-6831083/v1), 2025-07-01
Supplement: Supplementary file 1 [file ada06cfb80a0df6ea885e9ff.docx]

***Supplementary information***

**Balancing productivity and sustainability: Cattle farming, energy intensity, and environmental degradation in Latin America**

Mejía, Daniela1; Junca Paredes, John Jairo2; Burkart, Stefan2*

1 Universidad EAFIT, Medellín, Colombia

2 International Center for Tropical Agriculture (CIAT), Cali, Colombia

*** Correspondence:**Stefan Burkart
[s.burkart@cgiar.org](mailto:s.burkart@cgiar.org)

**Supplementary Table S1.** Results of the Granger causality tests

| Grangertest (d2_ener~d2_produc, order=5)  Granger Causality Test  Model 1: d2_ener ~ Lags(d2_ener, 1:5) + Lags(d2_produc, 1:5)  Model 2: d2_ener ~ Lags(d2_ener, 1:5)  Res.Df Df F Pr(>F)  1 1  2 6 -5 344.86 **0.04086 ***  **# Cattle production Granger-causes agricultural energy use with a lag of five periods** | Grangertest (d2_produc~d2_ener, order=5)  Granger Causality Test  Model 1: d2_produc ~ Lags(d2_produc, 1:5) + Lags(d2_ener, 1:5)  Model 2: d2_produc ~ Lags(d2_produc, 1:5)  Res.Df Df F Pr(>F)  1 1  2 6 -5 24.608 0.1518  **# Energy use never Granger-causes cattle production** |
| --- | --- |
| Grangertest (d2_emissi~d2_ener, order=4)  Granger causality test  Model 1: d2_emissi ~ Lags(d2_emissi, 1:4) + Lags(d2_ener, 1:4)  Model 2: d2_emissi ~ Lags(d2_emissi, 1:4)  Res.Df Df F Pr(>F)  1 4  2 8 -4 7.6178 **0.03727** *  **# Energy use Granger-causes cattle emissions with a lag of four periods** | Grangertest (d2_ener~d2_emissi, order=4)  Granger Causality Test  Model 1: d2_ener ~ Lags(d2_ener, 1:4) + Lags(d2_emissi, 1:4)  Model 2: d2_ener ~ Lags(d2_ener, 1:4)  Res.Df Df F Pr(>F)  1 4  2 8 -4 1.3318 0.394  **# Cattle emissions never Granger-cause energy use** |

Note: This table presents the econometric results of the hypothesis tests regarding Granger causality among the variables of interest. Source: Own elaboration.

**Supplementary Table S2.** Results of tests for the optimal lag order of the VAR model

| AIC (n)  2 | HQ(n)  2 | SC (n)  2 | FPE (n)  1 |
| --- | --- | --- | --- |

Results of the hypothesis test to identify the optimal lag order for running the VAR model indicate that the appropriate order is 2. Source: Own elaboration.

**Supplementary Table S3.** Results of specification tests under the stability condition

| Roots of the characteristic polynomial:  0.8264 0.8264 0.6166 0.3288 0.3288 0.2021  Fitted plot and correlogram of Gross Production Value (cattle) residuals.  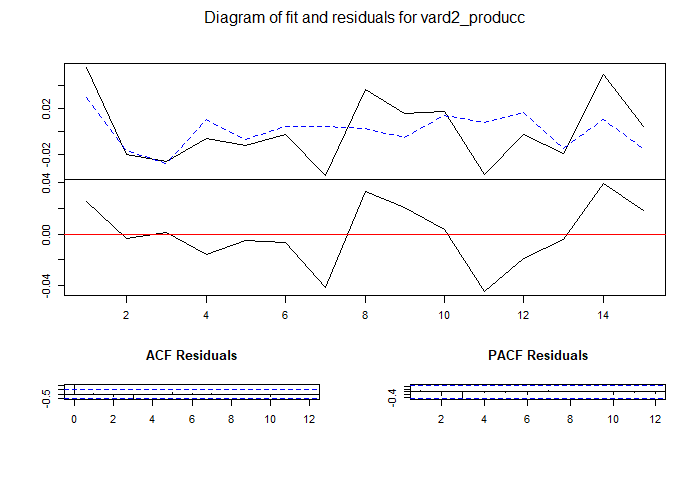  Fitted plot and correlogram of Energy intensity in agriculture residuals.  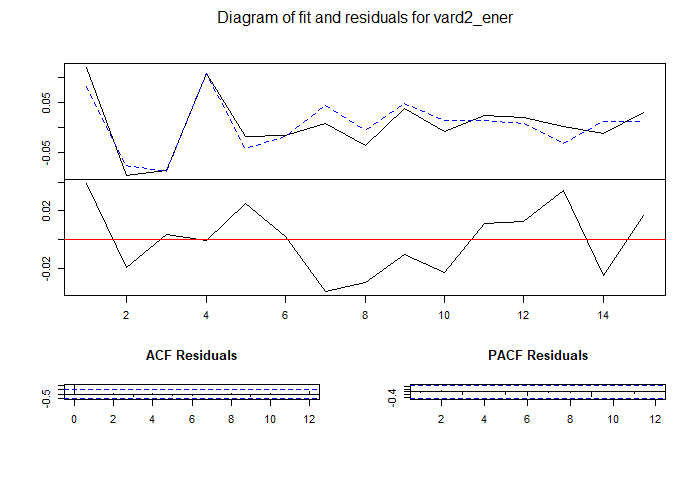  Fitted plot and correlogram of CO2eq emissions residuals.  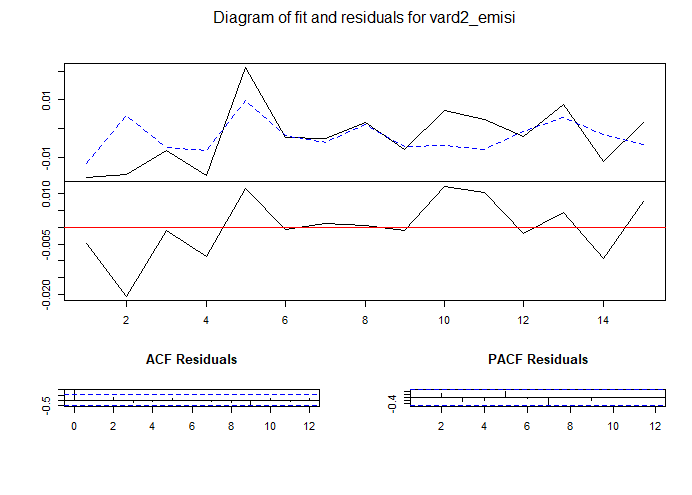 |
| --- |

Note: The results of the characteristic polynomial roots and correlogram plots of the variables of interest are presented to assess stationarity. Source: Own elaboration.

**Supplementary Table S4.** Results of the serial autocorrelation test of the residuals

| H0: The residuals are not autocorrelated >.05 accept H0  H1: The residuals are autocorrelated <.05 accept H1  Portmanteau Test (asymptotic)  data: Residuals of VAR object var1  Chi-squared = 10.635, df = 0, p-value < 2.2e-16 |
| --- |

Note: This table presents the results of the hypothesis test for detecting serial autocorrelation in the residuals. Source: Own elaboration.

**Supplementary Table S5.** Results of the normality test of the residuals

| H0: The residuals are normally distributed >0.05 accept H0  H1: The residuals are not normally distributed <0.05 accept H1  $Skewness  Skewness only (multivariate)  data: Residuals of VAR object var1  Chi-squared = 0.90919, df = 3, p-value = 0.8232  $Kurtosis  Kurtosis only (multivariate)  data: Residuals of VAR object var1  Chi-squared = 0.93233, df = 3, p-value = 0.8176 |
| --- |

Note: This table presents the results of the hypothesis test for the normality of the model's residuals. Source: Own elaboration.

**Supplementary Table S6.** Results of the test for homoscedasticity of the residual variance

| H0: The variance of the residuals is constant >0.05 accept H0  H1: The variance of the residuals is not constant <0.05 accept H1  ARCH (multivariate)  data: Residuals of VAR object var1  Chi-squared = 78, df = 72, p-value = 0.2939 |
| --- |

Note: This table presents the results of the hypothesis test for homoscedasticity of the residual variance of the model. Source: Own elaboration.

**Supplementary Table S7.** Results of unit root tests for the Panel VAR model

| intensity_UR  Levin-Lin-Chu Unit-Root Test (ex. var.: Individual Intercepts)  data: intensity_UR  z = -3.2559, p-value = 0.0005652  alternative hypothesis: stationarity  intensity_UR  Maddala-Wu Unit-Root Test (ex. var.: Individual Intercepts)  data: intensity_UR  chisq = 62.231, df = 24, p-value = 3.072e-05  alternative hypothesis: stationarity  intensity_UR  Im-Pesaran-Shin Unit-Root Test (ex. var.: Individual Intercepts)  data: intensity_UR  Wtbar = -2.914, p-value = 0.001784  alternative hypothesis: stationarity | emissions_UR  Levin-Lin-Chu Unit-Root Test (ex. var.: Individual Intercepts)  data: emissions_UR  z = 0.31504, p-value = 0.6236  alternative hypothesis: stationarity  emissions_UR  Maddala-Wu Unit-Root Test (ex. var.: Individual Intercepts)  data: emissions_UR  chisq = 38.217, df = 24, p-value = 0.03294  alternative hypothesis: stationarity  emissions_UR  Im-Pesaran-Shin Unit-Root Test (ex. var.: Individual Intercepts)  data: emissions_UR  Wtbar = 0.99442, p-value = 0.84  alternative hypothesis: stationarity | production_UR  Levin-Lin-Chu Unit-Root Test (ex. var.: Individual Intercepts)  data: production_UR  z = -4.4817, p-value = 3.703e-06  alternative hypothesis: stationarity  production_UR  Maddala-Wu Unit-Root Test (ex. var.: Individual Intercepts)  data: production_UR  chisq = 24.563, df = 24, p-value = 0.4298  alternative hypothesis: stationarity  production_UR  Im-Pesaran-Shin Unit-Root Test (ex. var.: Individual Intercepts)  data: production_UR  Wtbar = -0.1704, p-value = 0.4323  alternative hypothesis: stationarity |
| --- | --- | --- |

Note: This table presents the results of the hypothesis test for unit root tests in the Panel VAR model. Source: Own elaboration

**Supplementary Table S8.** Results of the unit root tests for the Panel VAR model (in first differences)

| dif1_intensity  Levin-Lin-Chu Unit-Root Test (ex. var.: Individual Intercepts)  data: dif1_intensity  z = -9.7439, p-value < 2.2e-16  alternative hypothesis: stationarity | dif1_emissions  Levin-Lin-Chu Unit-Root Test (ex. var.: Individual Intercepts)  data: dif1_emissions  z = -12.708, p-value < 2.2e-16  alternative hypothesis: stationarity | dif1_production  Levin-Lin-Chu Unit-Root Test (ex. var.: Individual Intercepts)  data: dif1_production  z = -7.6963, p-value = 7.002e-15  alternative hypothesis: stationarity |
| --- | --- | --- |

Note: This table presents the results of the hypothesis test for unit root tests in the Panel VAR model using first differences. Source: Own elaboration.

**Supplementary Table S9.** Results of the PANELVAR model

| PANELVAR_5 <- pvargmm (dependent_vars = c("energy_intensity_agri", "CO2eq", "Gross_Produ_cattle"),  lags = 1,  transformation = "fod",  data = BD_PRUEBA,  panel_identifier = c("area","year"),  steps = c("twostep"),  system_instruments = TRUE,  system_constant = TRUE,  pca_instruments = TRUE,  pca_eigenvalue = 1,  max_instr_dependent_vars = 60,  max_instr_predet_vars = 60,  min_instr_dependent_vars = 2L,  min_instr_predet_vars = 1L,  collapse = TRUE,  tol = 1e-09)  ---------------------------------------------------  Dynamic Panel VAR estimation, two-step GMM  ---------------------------------------------------  Transformation: Forward orthogonal deviations  Group variable: area  Time variable: year  Number of observations = 204  Number of groups = 12  Obs per group: min = 17  avg = 17  max = 17  Number of instruments = 24  ====================================================================================  energy_intensity_agri CO2eq Gross_Produ_cattle  --------------------------------------------------------------------------------------------  lag1_ energy_intensity_agri 0.9972 *** 0.2634 0.5589  (0.1994) (0.1366) (0.3215)  lag1_CO2eq 0.6937 2.1914 *** 3.2029 *  (0.5588) (0.5454) (1.4090)  lag1_Gross_Produ_cattle 0.0886 -0.3490 * 0.1307  (0.1647) (0.1636) (0.3163)  const -8.1573 * -5.7381 -17.0194 *  (4.0616) (2.9896) (8.5484)  ====================================================================================  *** p < 0.001; ** p < 0.01; * p < 0.05  ---------------------------------------------------  Instruments for equation  Standard    GMM-type  Dependent vars: L (2, 17)  Collapse = TRUE  ---------------------------------------------------  Hansen test of overid. restrictions: chi2(12) = 0.83 Prob > chi2 = 1  (Robust, but weakened by many instruments.) |
| --- |

Note: This table presents the modeling specifications for the PANELVAR model. Source: Own elaboration.
